# Supplementary material for: A comparison of the enzymatic properties of three recombinant isoforms of thrombolytic and antibacterial protein—Destabilase-Lysozyme from medicinal leech
Source: PubMed Central journal article supplement (PMC4654880; doi:10.1186/s12858-015-0056-3), 2015-11-21
Supplement: 12858_2015_56_MOESM5_ESM.pdf [file 12858_2015_56_MOESM5_ESM.pdf]

Analysis of the protein tryptic charts of additional bands in mDL sample by MALDI-TOF mass-spectrometry.

mDL-Ds1 main band with MW near 16 kDa.

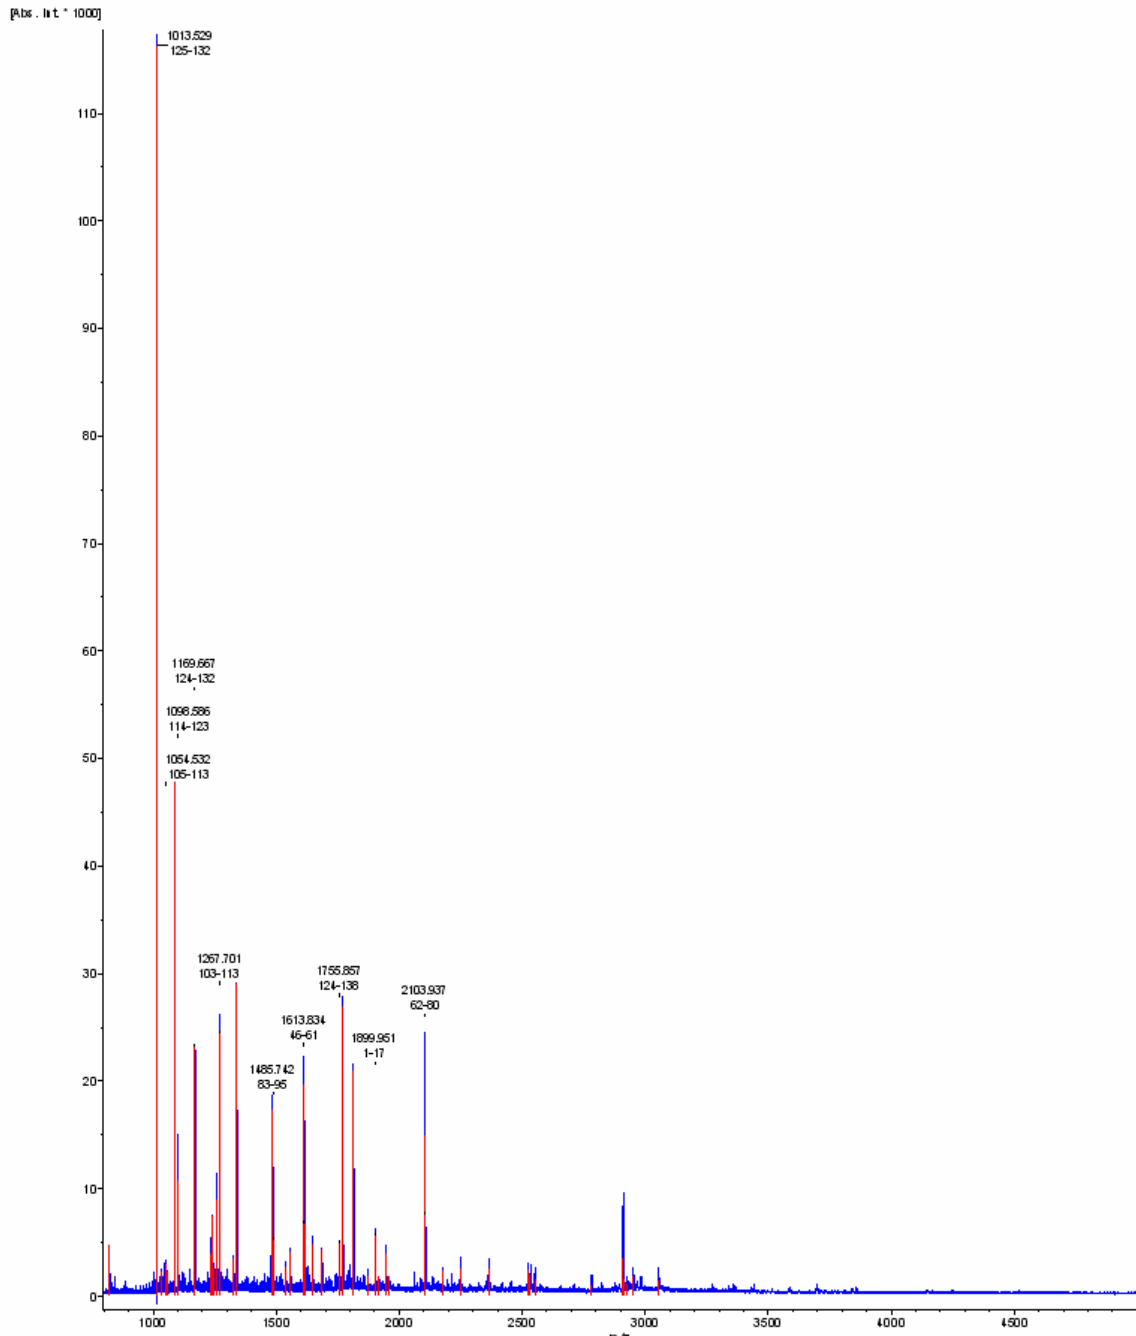

Intensity Coverage: 48.7% (229932 hits)  
 Sequence Coverage MS/MS: 0.0%

Sequence Coverage MS: 73.2%  
 pI (isoelectric point): 7.9

| 10         | 20         | 30         | 40         | 50         | 60         | 70         | 80         | 90         | 100       | 110        |
|------------|------------|------------|------------|------------|------------|------------|------------|------------|-----------|------------|
| MGSSHHHEHK | SSGLVPRGSH | MGSTVPSDCL | SCICEVEGCD | KEIGRCGDDA | GSLSCGPTQL | KEPYWIDCGS | PGAGYQECTK | EKACSETCVH | AYMDRYRRC | TRGREPTCQD |
| 120        | 130        | 140        |            |            |            |            |            |            |           |            |
| YAKIHQMGPN | GCRRISNTYU | NKANACLN   |            |            |            |            |            |            |           |            |



mDL-Ds1 additional band with MW near 44 kDa.

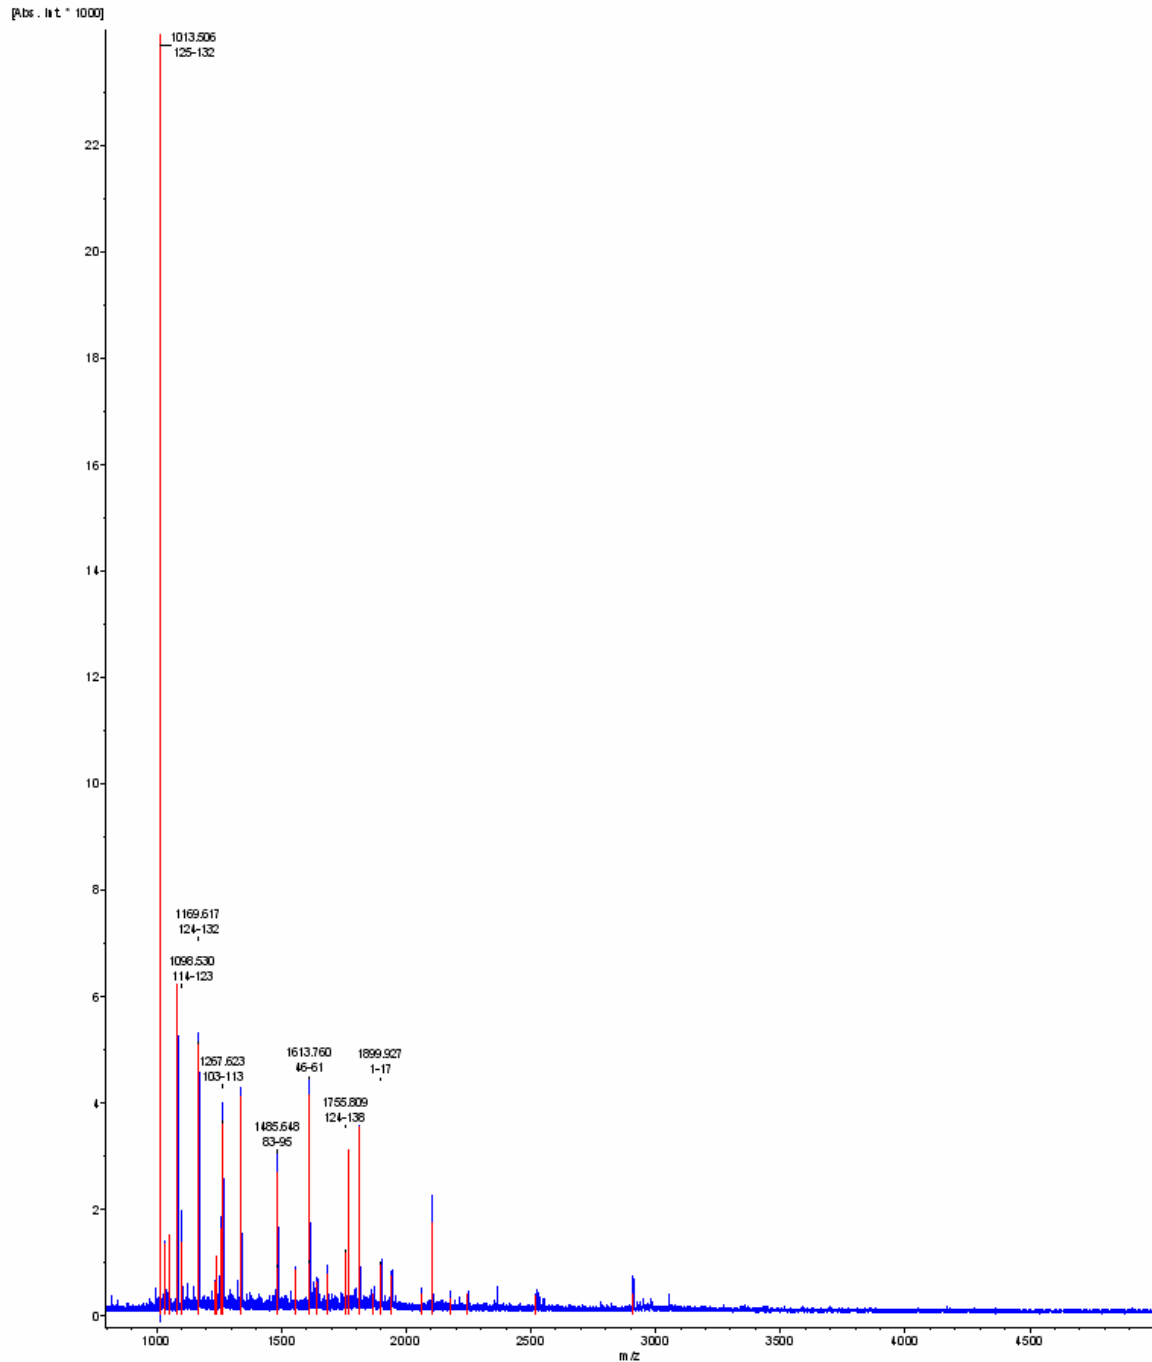

Intensity Coverage: 55.4% (41939 counts)      Sequence Coverage MS: 59.4%  
 Sequence Coverage MS/MS: 0.0%      pI (isoelectric point): 7.9

|            |            |            |            |            |            |            |            |            |            |            |
|------------|------------|------------|------------|------------|------------|------------|------------|------------|------------|------------|
| 10         | 20         | 30         | 40         | 50         | 60         | 70         | 80         | 90         | 100        | 110        |
| MGSSHEBEHH | SSGLVPAQSB | NGSTVPSDCL | SCICEVEGCD | KEIGRCGDDA | GSLSCGPTQI | KEPYVIDCGS | PG&GTQECTK | ERACSETCVH | AYMDRYPRRC | TRGREPTCQD |
| 120        | 130        | 140        |            |            |            |            |            |            |            |            |
| YAKIHNAGPM | GCRRTSNTYD | NKANACLN   |            |            |            |            |            |            |            |            |

mDL-Ds2 main band with MW near 16 kDa.

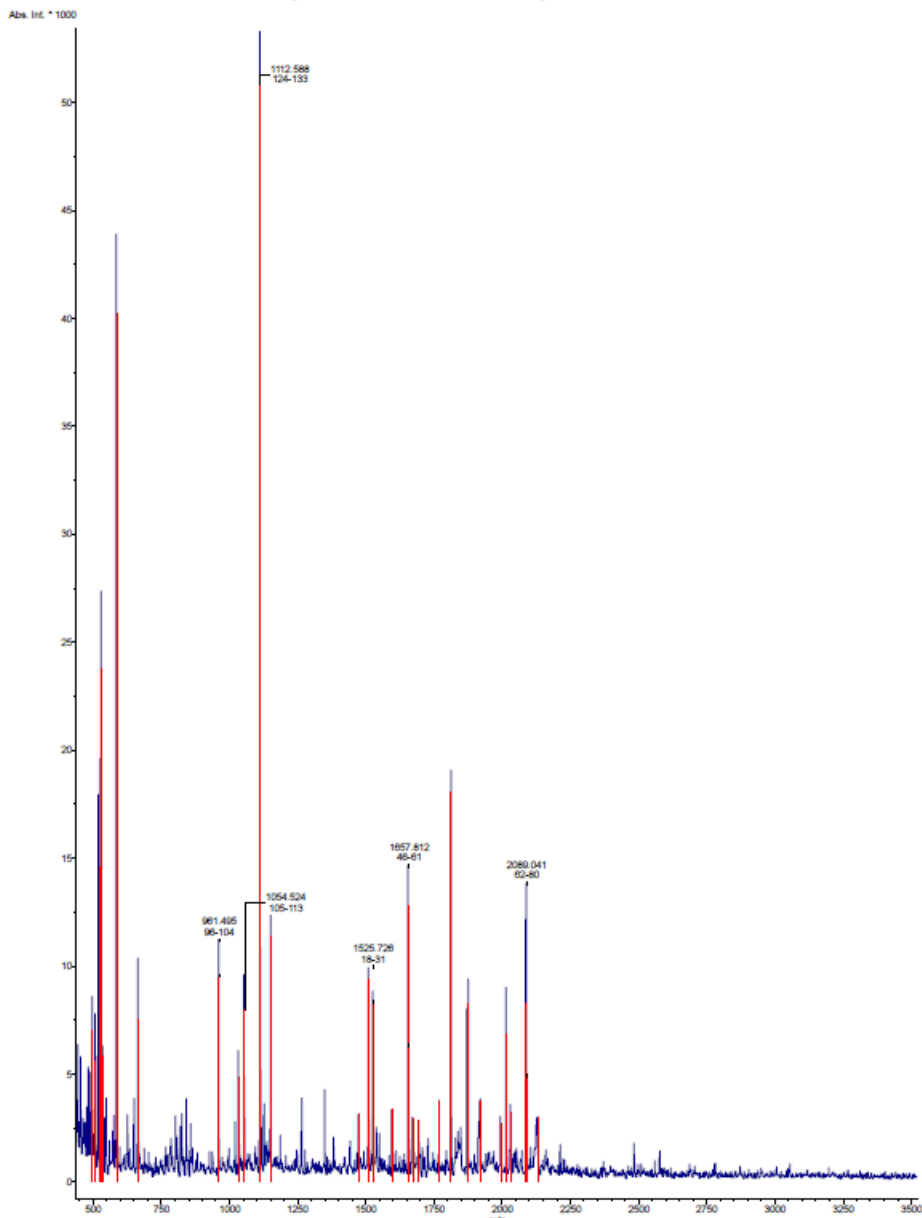

Intensity Coverage: 31.6 % (95419 cnts) Sequence Coverage MS: 55.4%  
 Sequence Coverage MS/MS: 0.0% pI (isoelectric point): 10.4

|           |            |            |            |            |            |            |           |            |            |          |            |            |           |
|-----------|------------|------------|------------|------------|------------|------------|-----------|------------|------------|----------|------------|------------|-----------|
| 10        | 20         | 30         | 40         | 50         | 60         | 70         | 80        | 90         | 100        | 110      | 120        | 130        | 140       |
| MGSSHHHHH | SSGLVPRGSH | MSSQPTDSCI | RCICKVEGCD | SQIGKCGMDV | GSLSCGPEYI | KKPYWIDCGK | FGGYESCTK | NKACSETCVR | AYMKRYGTFC | TGRPTCQD | YARIHWGSPR | GCZSSATVGY | WIKVQKCLR |

mDL-Ds2 additional band with MW near 28 kDa.

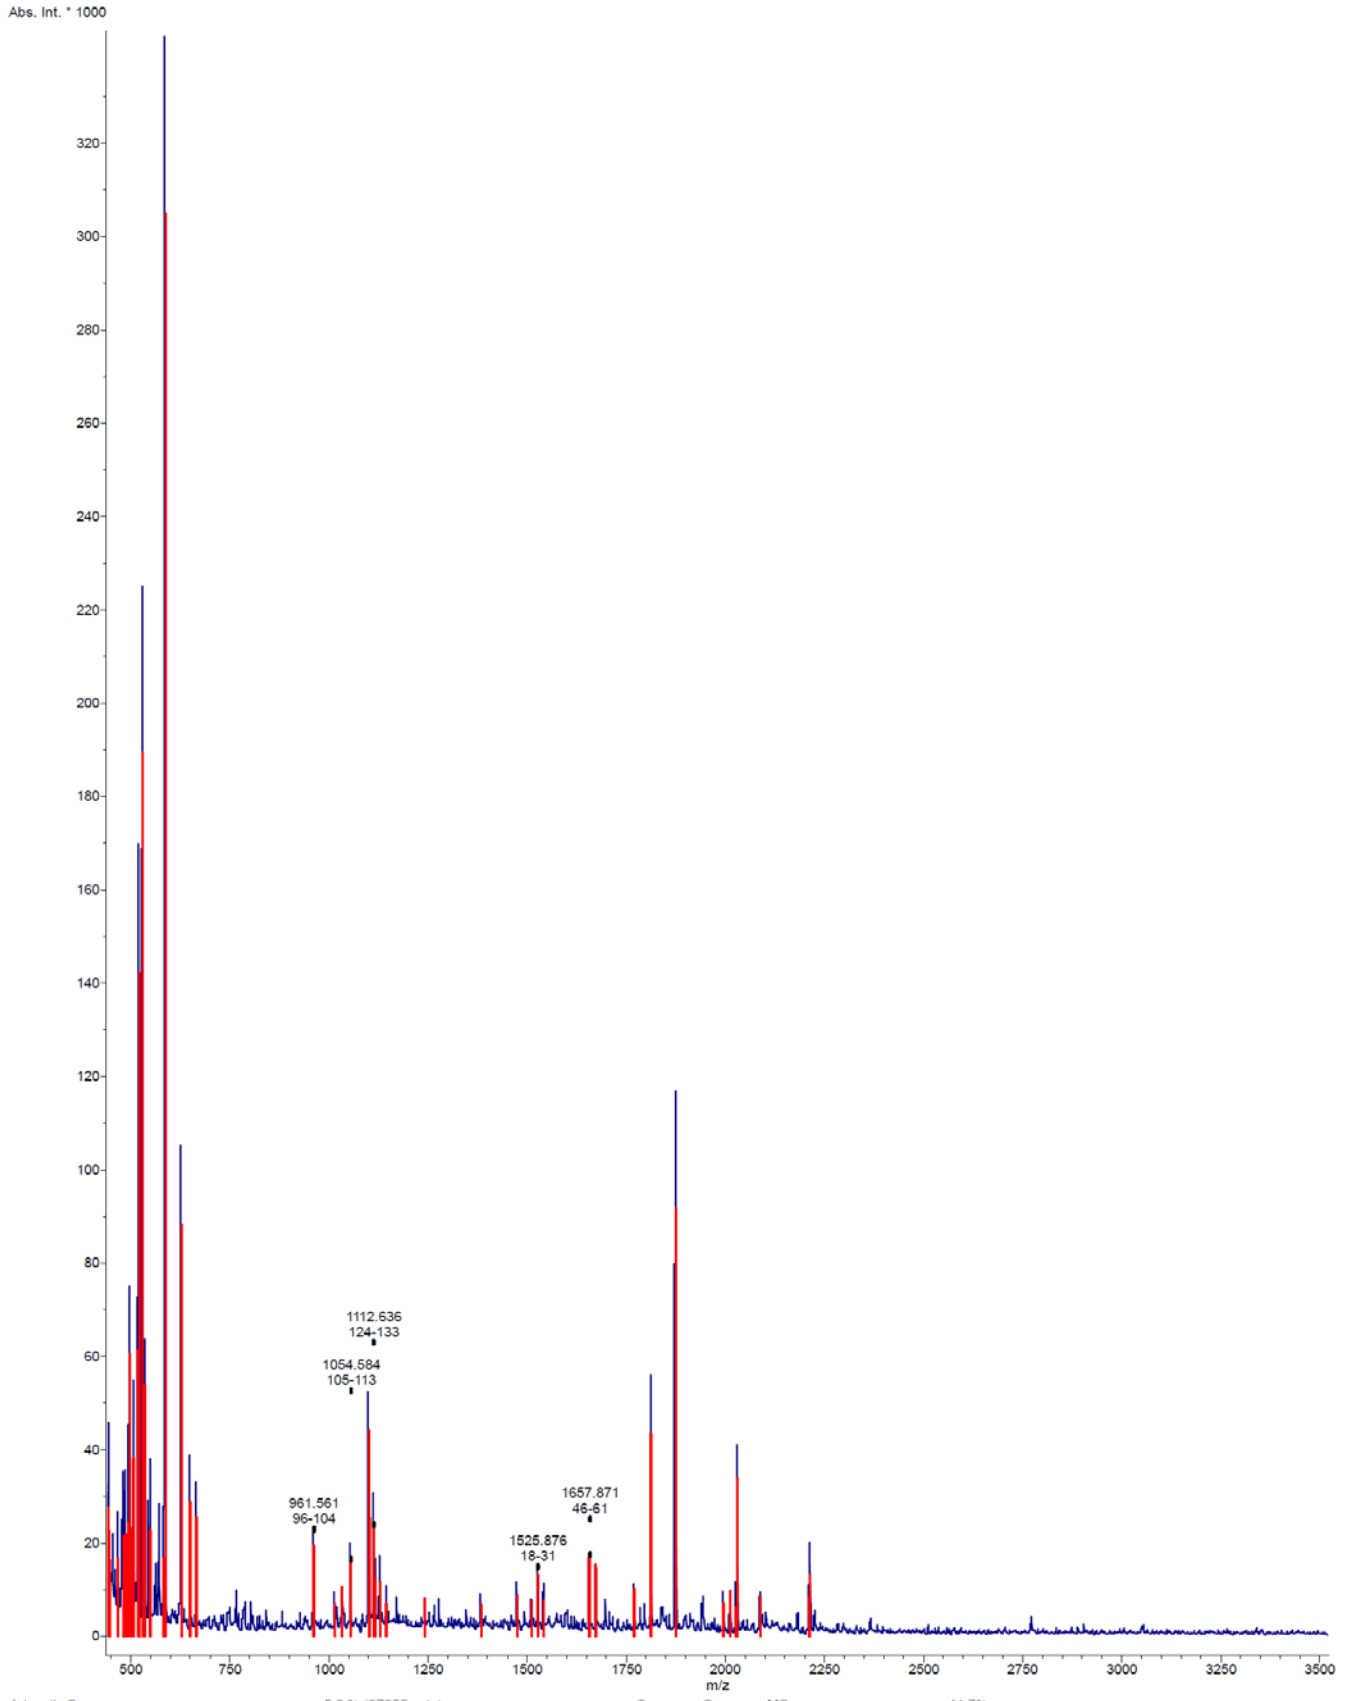

Intensity Coverage: 5.0% (87055 cnts)      Sequence Coverage MS: 41.7%  
 Sequence Coverage MS/MS: 0.0%      pl (isoelectric point): 10.4

|           |            |            |            |            |            |           |            |            |            |           |           |            |           |
|-----------|------------|------------|------------|------------|------------|-----------|------------|------------|------------|-----------|-----------|------------|-----------|
| 10        | 20         | 30         | 40         | 50         | 60         | 70        | 80         | 90         | 100        | 110       | 120       | 130        | 140       |
| MSSSHHHHH | SSGLVPRGSH | MSSQFTDSCI | RCICKVEGCD | SQIGKCGMDV | GSLSCGPIQI | KKPYWIDGK | PEGGYESTCK | NKACSETCVR | AYMKRYGTPC | TGGRTPTQD | YARIHNGPR | GCKSSATVGY | NKIVQKCLR |

mDL-Ds2 additional band with MW near 44 kDa.

Abs. Int. \* 1000

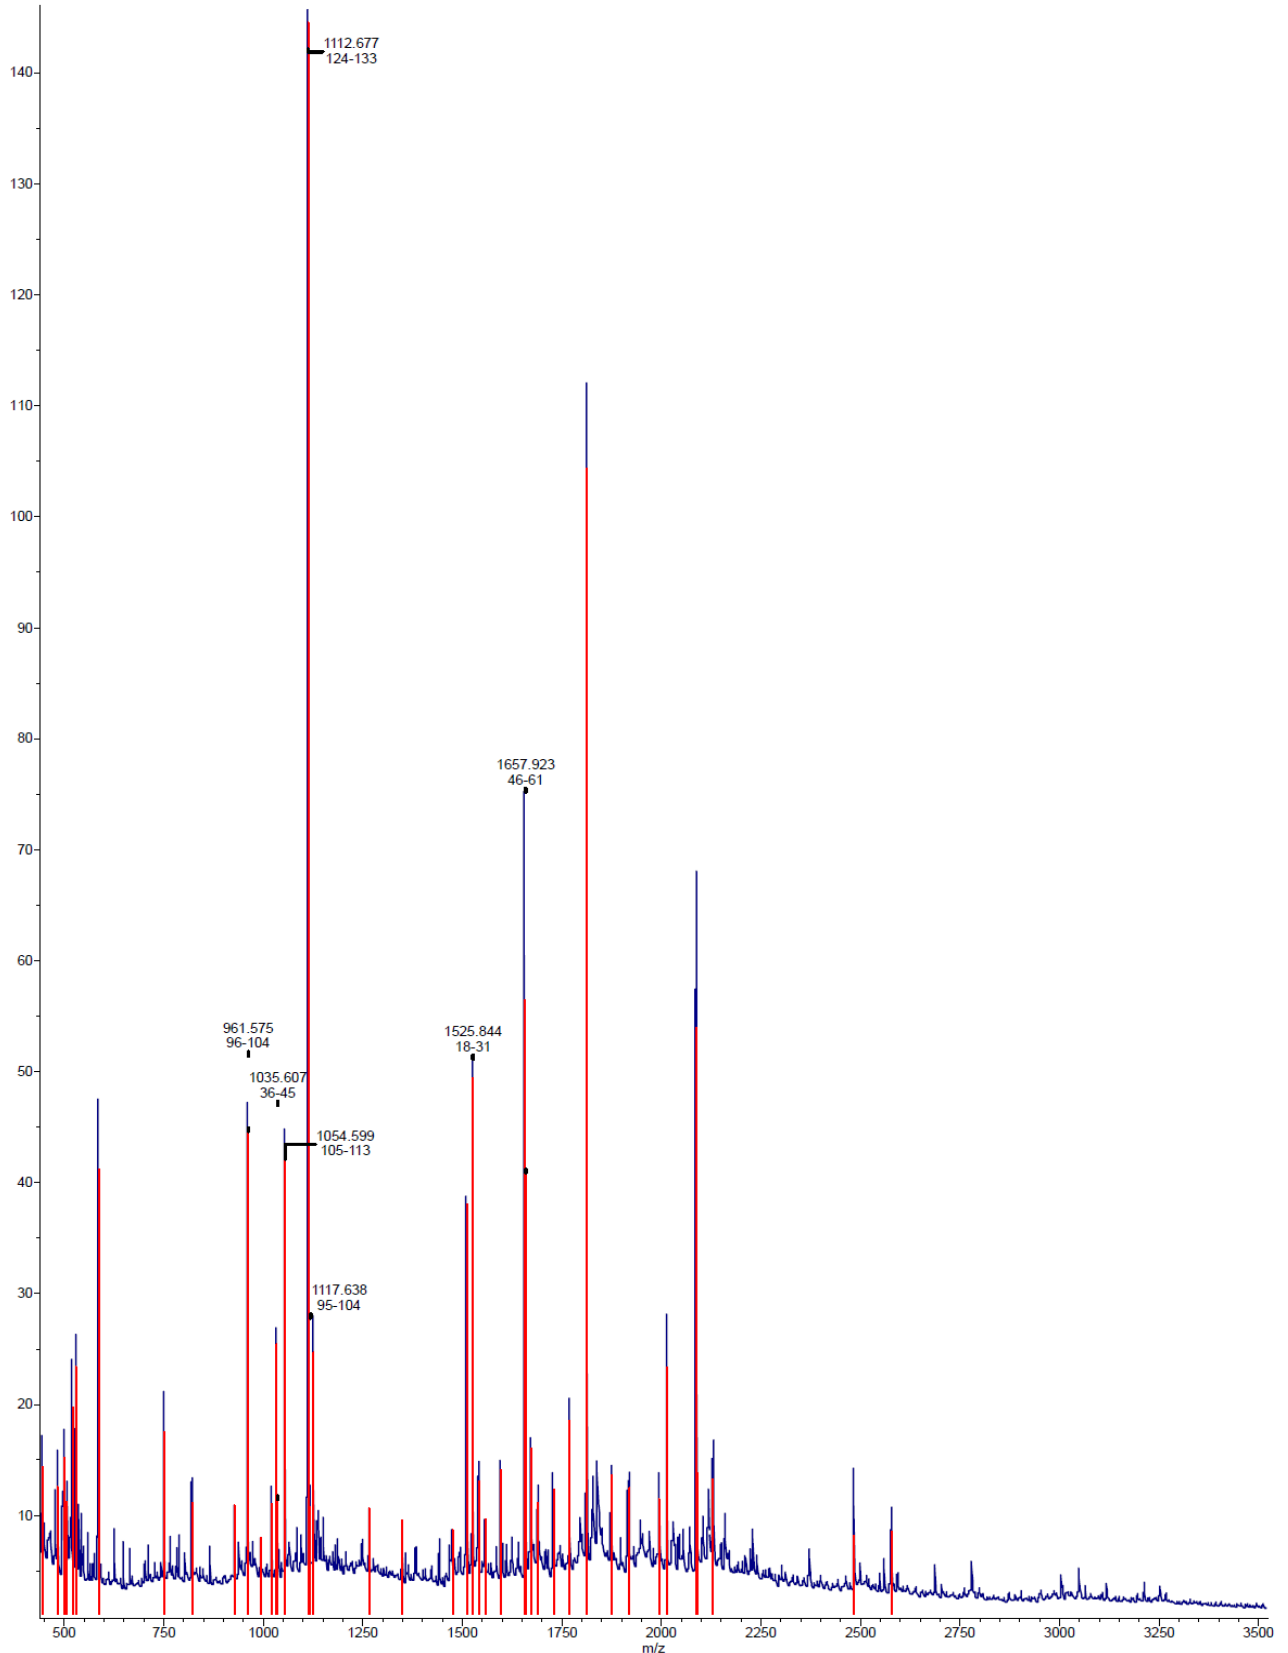

Intensity Coverage: 33.5% (351753 cnts)      Sequence Coverage MS: 49.6%  
 Sequence Coverage MS/MS: 0.0%      pI (isoelectric point): 10.4

| 10        | 20         | 30         | 40         | 50         | 60         | 70         | 80        | 90         | 100        | 110       | 120        | 130        | 140       |
|-----------|------------|------------|------------|------------|------------|------------|-----------|------------|------------|-----------|------------|------------|-----------|
| MGSSHHHHH | SSGLVPRGSH | MGSQFTDSDL | RCICKVEGCD | SQIGKCGMDV | GSLSGFPYQI | KKPIWIDCGK | EGGGYESTK | NWACSETCVR | AYMKRVGTFC | TGGRTPTQD | YARIHNGGPR | GCKSSATVGY | NWKVQKCLR |

mDL-Ds3 main band with MW near 16 kDa.

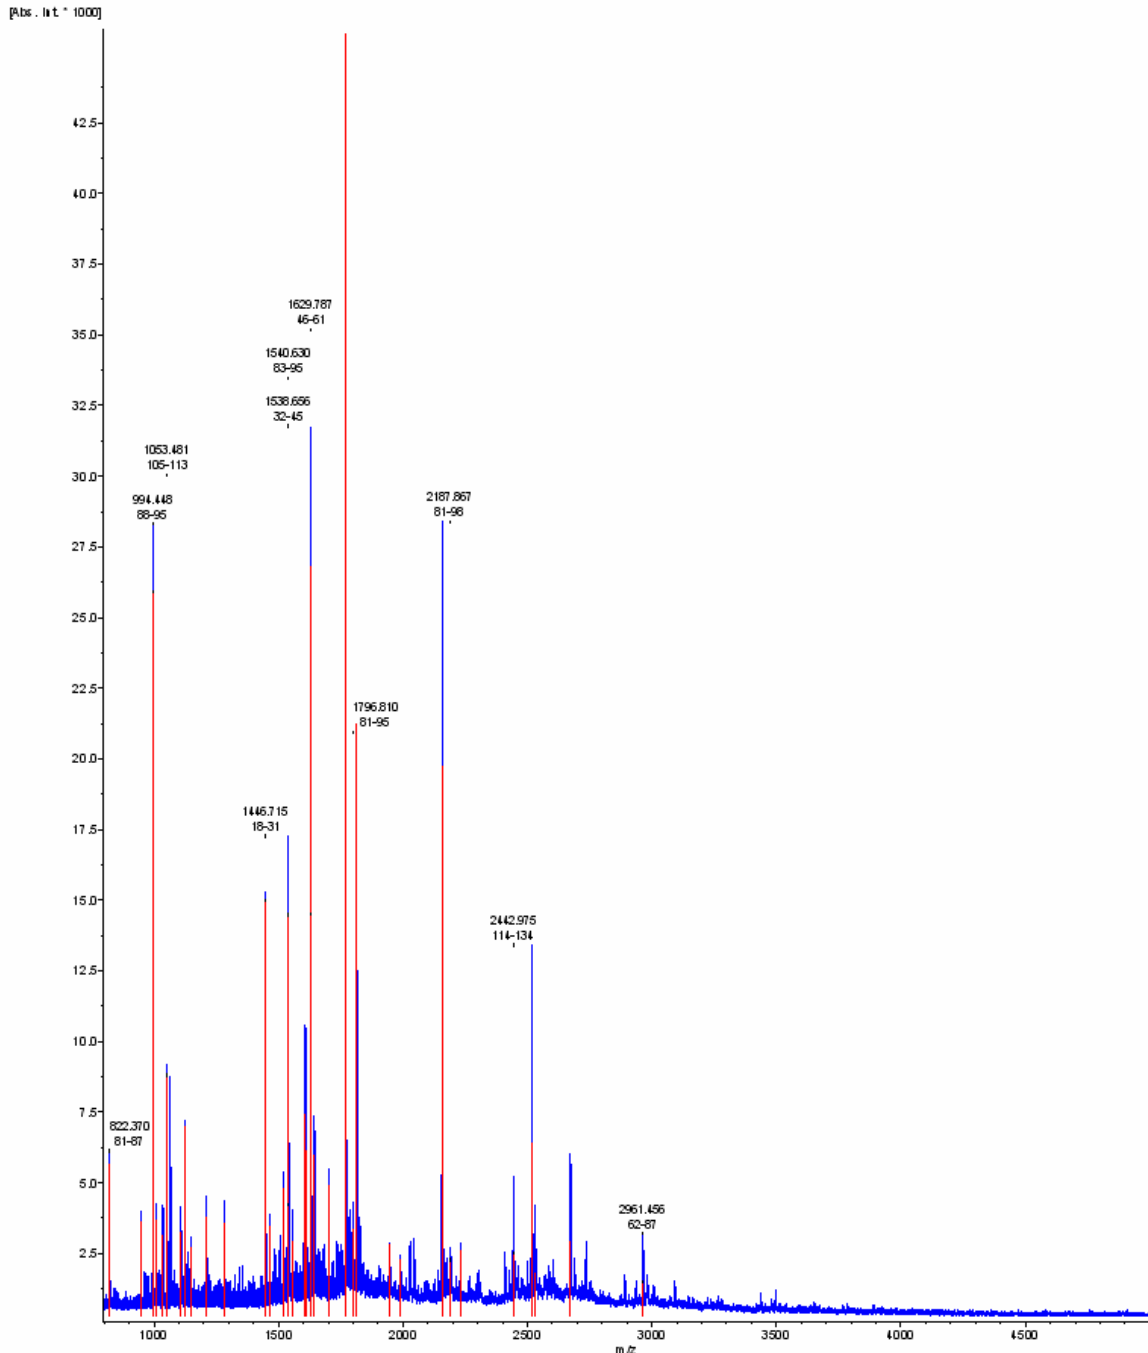

In % identity Coverage: 37.6% (115376 conts)      Sequence Coverage MS: 81.2%  
 Sequence Coverage MS/MS: 0.0%      pI (isoelectric point): 9.8

| 10         | 20         | 30         | 40         | 50         | 60         | 70         | 80         | 90         | 100        | 110        |
|------------|------------|------------|------------|------------|------------|------------|------------|------------|------------|------------|
| MGSSKBBBHK | SSGLVPRGSH | MGSTVPSDCL | RCICQVEGCM | NEIGRCGMDA | GSLSCGPTQI | KEPYVIDCGR | PGGGYQQCTK | ERACSERCVH | AYMDRTARRC | TGGRQPTCQD |
|            |            |            |            |            |            |            |            |            |            |            |
| 120        | 130        | 140        |            |            |            |            |            |            |            |            |
| YAKIHQNGPM | GCQSSNHHYV | DMVTRCLG   |            |            |            |            |            |            |            |            |
|            |            |            |            |            |            |            |            |            |            |            |

mDL-Ds3 additional band with MW near 28 kDa.

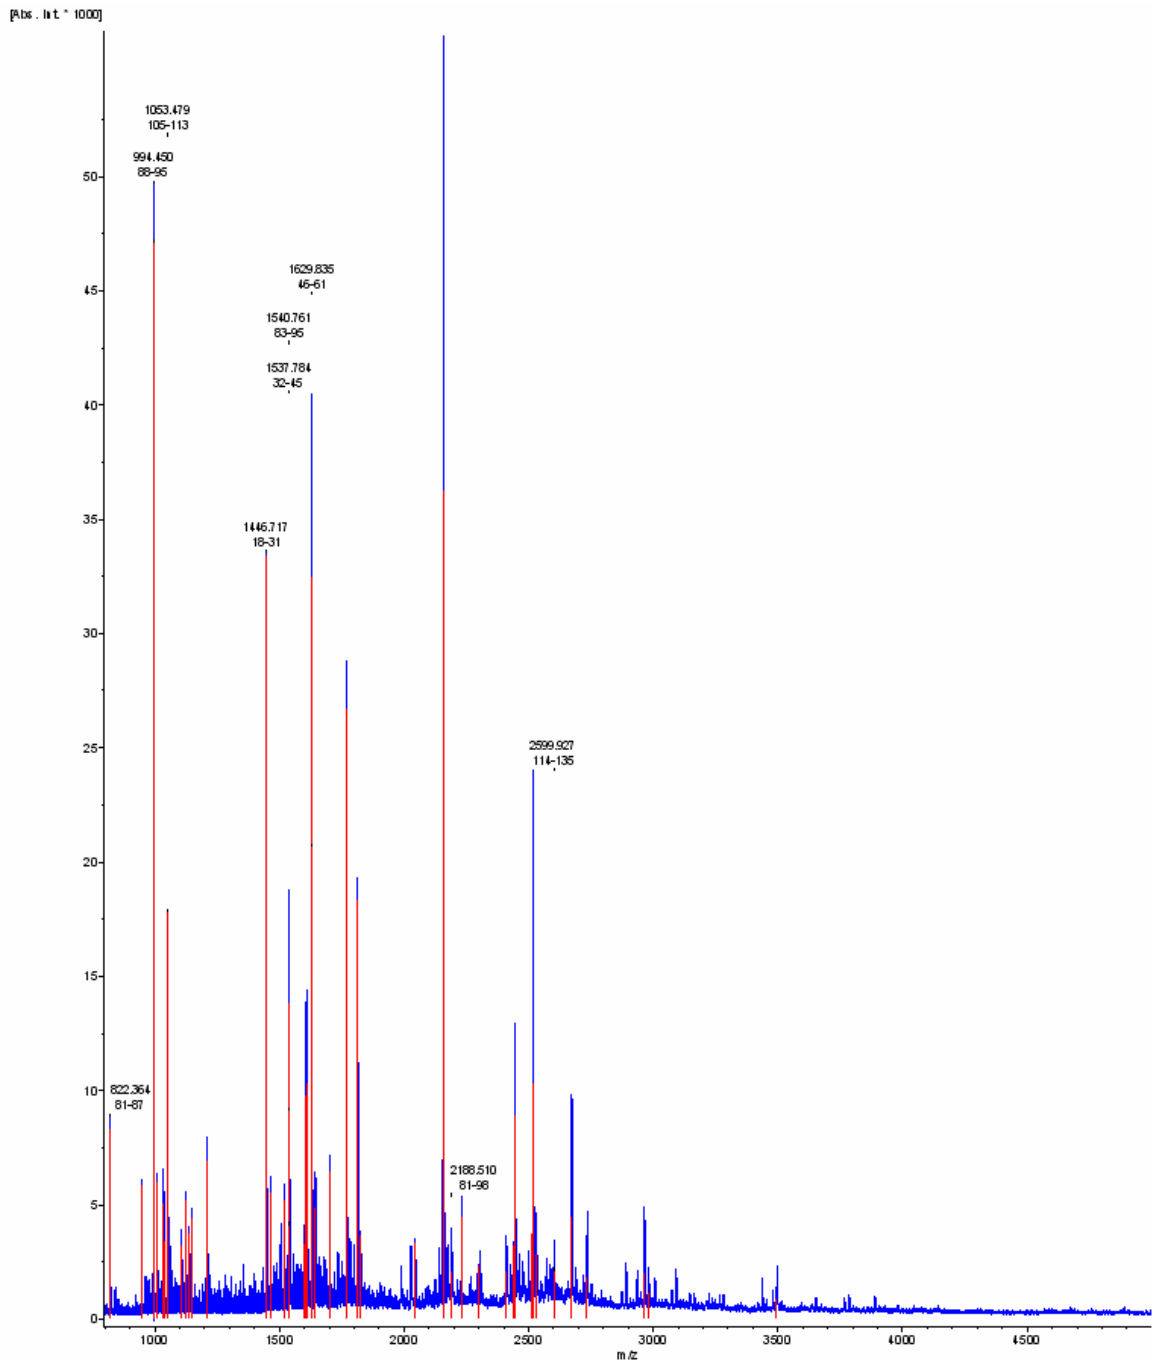

Intensity Coverage: 37.5 % (164463 cuts)      Sequence Coverage MS: 68.1%  
 Sequence Coverage MS/MS: 0.0%      pI (isoelectric point): 9.8

|             |            |            |            |            |           |            |          |            |           |            |
|-------------|------------|------------|------------|------------|-----------|------------|----------|------------|-----------|------------|
| 10          | 20         | 30         | 40         | 50         | 60        | 70         | 80       | 90         | 100       | 110        |
| MGSSKHEHEDI | SSGLVPRGSH | MGSTVPSDCL | RCICQVEGCM | NEIGRCGMDA | GSLSCPTQL | KIPVVIDCGR | PGGYQCTK | ERACSERCVH | LYMDRYARC | TGGRQPTCQD |
|             |            |            |            |            |           |            |          |            |           |            |
| 120         | 130        | 140        |            |            |           |            |          |            |           |            |
| YAKIHNMGPN  | GCQSSNBYW  | DNVRCICG   |            |            |           |            |          |            |           |            |



mDL-Ds3 additional band with MW near 44 kDa.

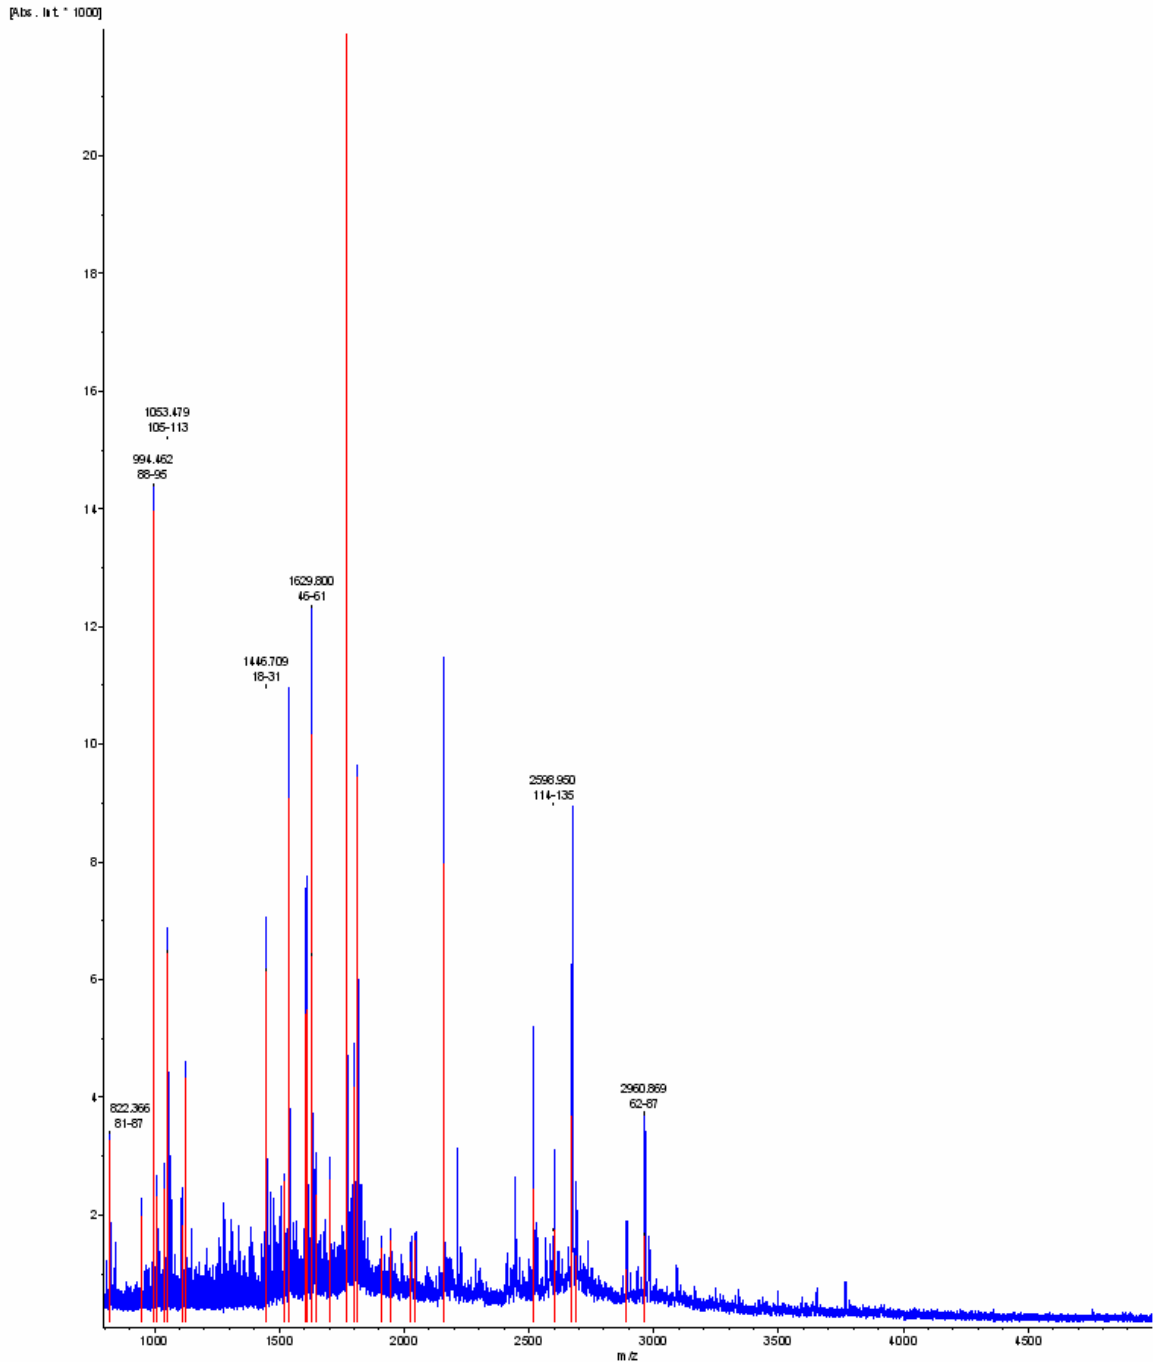

Intensity Coverage: 27.4% (42258 ions)  
Sequence Coverage MS/MS: 0.0%

Sequence Coverage MS: 68.8%  
pI (isoelectric point): 9.8

|             |            |            |            |            |            |            |           |            |            |            |
|-------------|------------|------------|------------|------------|------------|------------|-----------|------------|------------|------------|
| 10          | 20         | 30         | 40         | 50         | 60         | 70         | 80        | 90         | 100        | 110        |
| KGSSKHEDHEH | SSGLVPRGSH | KGSTVPSDCL | KCICQVEGCH | NEIGRCQMDA | GSLSCGPTQL | KEPYWIDCGR | PGGTYQCTK | EKACSEKCVH | AYMDRYARRC | TGEMQPTCQD |
| 120         | 130        | 140        |            |            |            |            |           |            |            |            |
| YAKIHDMGPN  | GCQSSNMHYU | DMVRCLE    |            |            |            |            |           |            |            |            |
