# Supplementary material for: A comparison of the enzymatic properties of three recombinant isoforms of thrombolytic and antibacterial protein—Destabilase-Lysozyme from medicinal leech
Source: PubMed Central journal article supplement (PMC4654880; doi:10.1186/s12858-015-0056-3), 2015-11-21

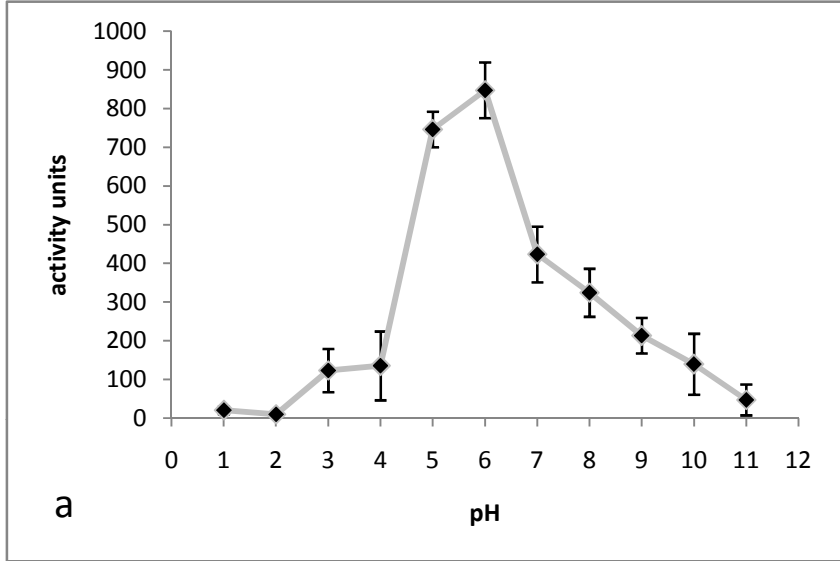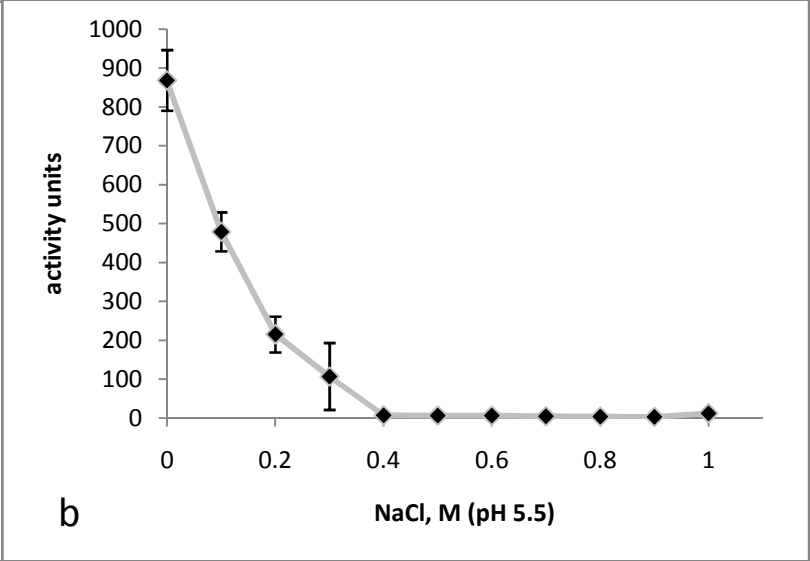

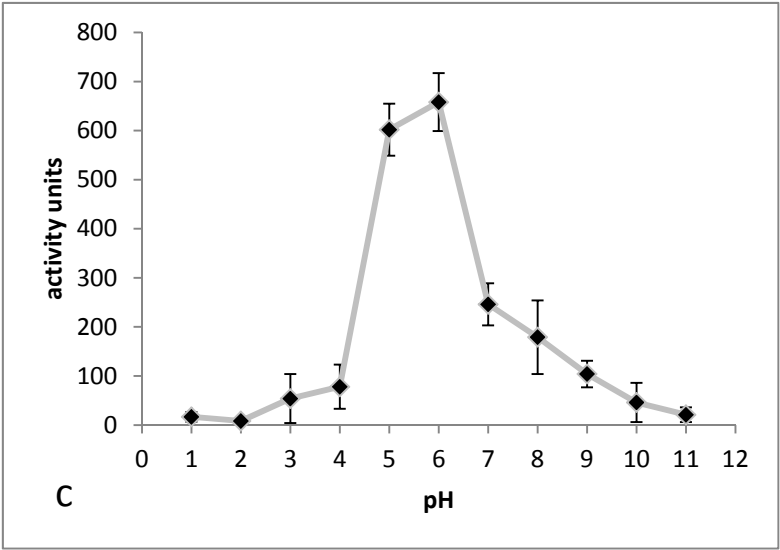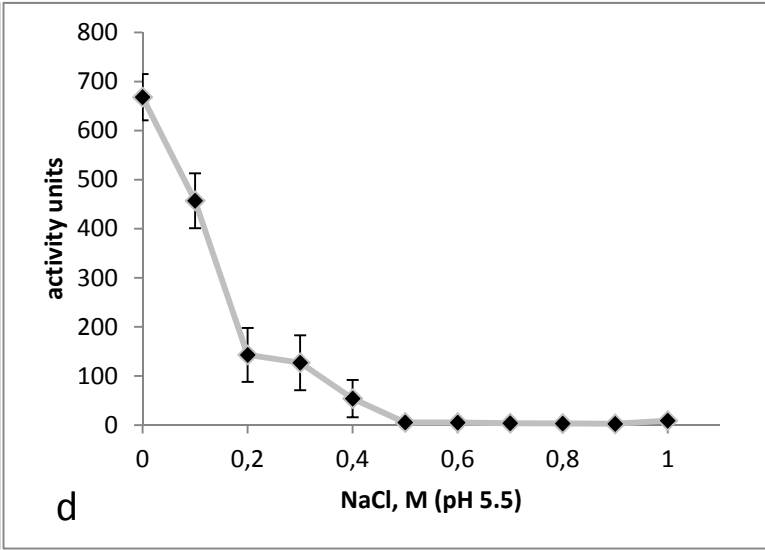

Supplement: 12858_2015_56_MOESM10_ESM.pdf [file 12858_2015_56_MOESM10_ESM.pdf]
